# Supplementary material for: The Flavor Characteristics, Antioxidant Capability, and Storage Year Discrimination Based on Backpropagation Neural Network of Organic Green Tea (Camellia sinensis) during Long-Term Storage
Source: MDPI journal article supplement (doi:10.3390/foods13050753), 2024-02-29
Supplement: s1 [file s1]

## **Supplementary Materials for**

The Flavor Characteristics, Antioxidant Capability, and Storage  
Year Discrimination Based on Backpropagation Neural  
Network of Organic Green Tea (*Camellia sinensis*) during  
Long-Term Storage

## ***In vitro* antioxidant capacity evaluation by five various assays**

### **FRAP assay**

Weigh 1g of organic green tea sample and add 4 mL of physiological saline in a 1:4 ratio of weight (g) to volume (mL). The sample was mechanically homogenized under ice water bath conditions, and then centrifuged at 4°C and 12000 r/min for 5 min before collecting the supernatant. Use an enzyme-linked immunosorbent assay analyzer to measure at 593 nm. The FRAP values of the organic green tea samples were calculated using FeSO<sub>4</sub> as the standard, and the calibration curve was established as follows:

$$Y_1 = 3.0713X_1 + 0.276 \quad (R^2 = 0.9962) \quad (1)$$

X<sub>1</sub> is the concentration of FeSO<sub>4</sub>, mmol/L; Y<sub>1</sub> represents OD<sub>593</sub>.

### **ABTS assay**

Accurately weigh 0.1 g of organic green tea sample and add 0.9 mL of physiological saline in a ratio of weight (g) to volume (mL)=1:9. Mechanical homogenization under ice water bath conditions, centrifugation at 12000 r/min for 5 min, and then take the supernatant. Measure at 405 nm wavelength using an enzyme-linked immunosorbent assay (ELISA) analyzer. The ABTS value of organic green tea samples was calculated using Trolox as the standard, and a calibration curve was established as follows:

$$Y_2 = -1.1215X_2 + 1.1262 \quad (R^2 = 0.9957) \quad (2)$$

X<sub>2</sub> is the concentration of Trolox, mmol/L; Y<sub>2</sub> represents OD<sub>405</sub>.

### **DPPH assay**

Weigh 0.1g of organic green tea sample, add 1 mL of 80% methanol solution, and homogenize in an ice water bath. Centrifuge at 12000 r/min for 10 min and then take the supernatant. Measure the sample at 517 nm using a UV visible spectrophotometer. The DPPH radical scavenging rate based on equation (3):

$$\text{DPPH radical scavenging rate (\%)} = [A_{\text{blank}} - (A_{\text{test}} - A_{\text{control}})] / A_{\text{blank}} * 100\% \quad (3)$$

### **HSA assay**

Take 0.1 g of organic green tea sample, add 5 mL of distilled water and extract in

boiling water bath for 10 min, centrifuge at 12000 r/min for 10 min and then take the supernatant and dilute 10 times. It was measured at 550 nm using UV-visible spectrophotometer. Calculate the rate of HSA according to equation (4):

$$\text{Rate of HSA(\%)} = [A_{\text{blank}} - (A_{\text{test}} - A_{\text{control}})] / A_{\text{blank}} * 100\% \quad (4)$$

#### **SSA assay**

Weigh 0.1 g of organic green tea sample, add 5 mL of distilled water in a boiling water bath for 10 min, centrifuge at 12000 r/min for 10min and then take the supernatant and dilute 10 times. It was measured at 550 nm using UV-visible spectrophotometer. Calculate the rate of SSA according to equation (5):

$$\text{Rate of SSA (\%)} = (A_{\text{control}} - A_{\text{test}}) / (A_{\text{control}} - A_{\text{blank}}) * 100\% \quad (5)$$

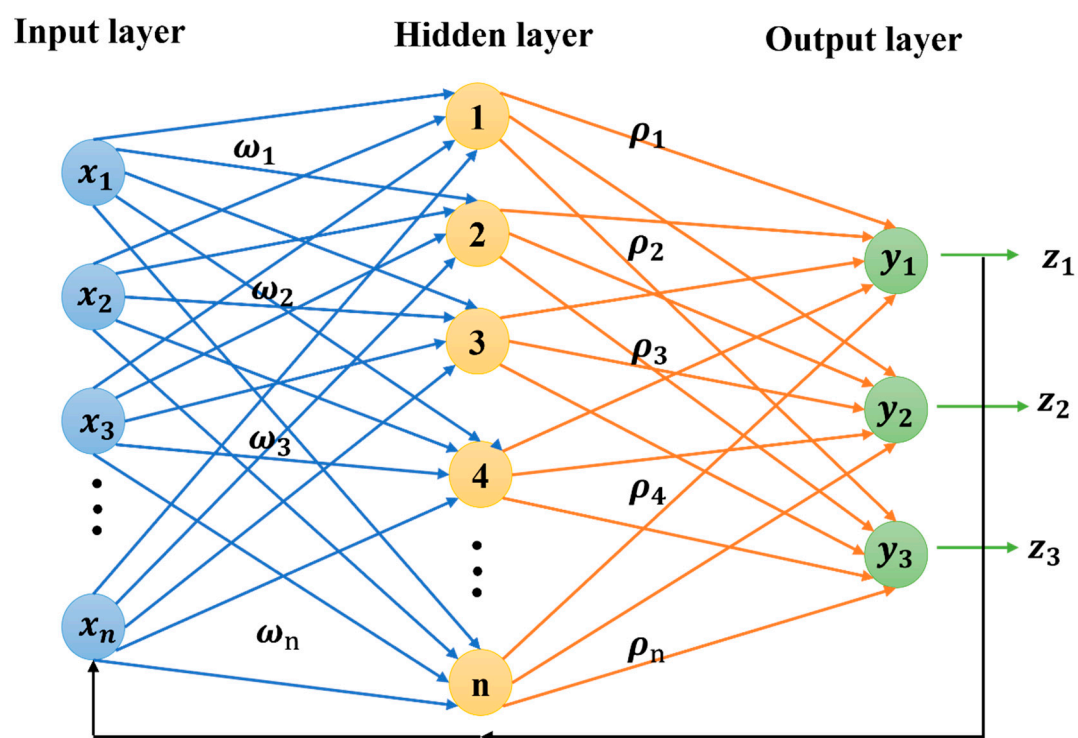

**Figure S1.** Schematic diagram of the structure of the BPNN model.

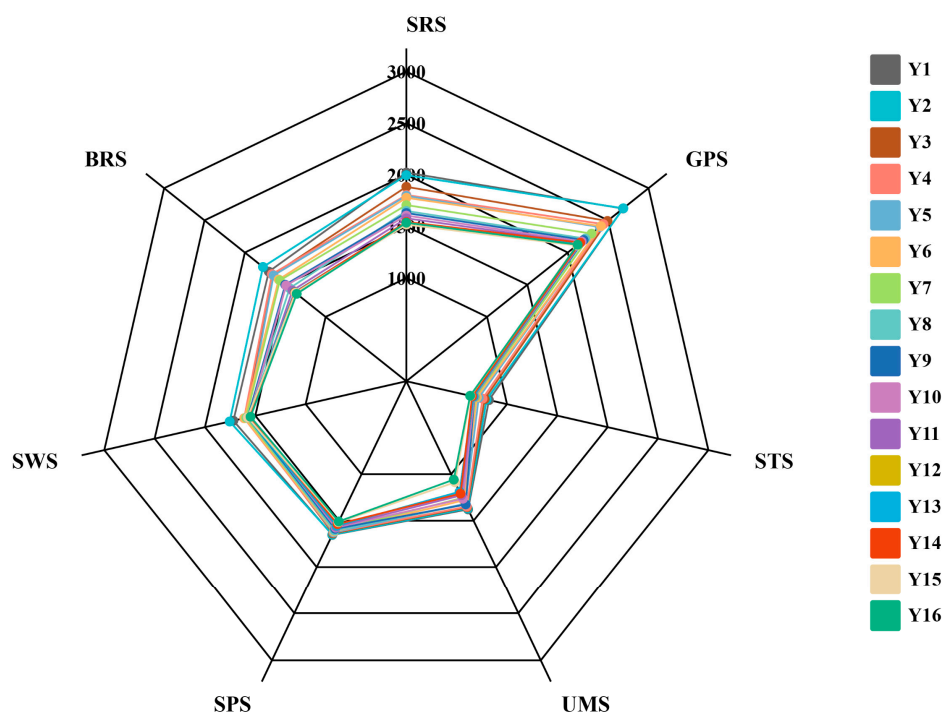

**Figure S2.** Radar plots based on electronic tongue response values of organic green teas of different storage years.

**Table S1.** Detailed information of organic green tea with different storage years.

| Samples | Production year | Storage year | Standard for picking fresh leaves | Production area    |
|---------|-----------------|--------------|-----------------------------------|--------------------|
| Y1      | 2021            | 1            |                                   |                    |
| Y2      | 2020            | 2            |                                   |                    |
| Y3      | 2019            | 3            |                                   |                    |
| Y4      | 2018            | 4            |                                   |                    |
| Y5      | 2017            | 5            |                                   |                    |
| Y6      | 2016            | 6            |                                   |                    |
| Y7      | 2015            | 7            |                                   |                    |
| Y8      | 2014            | 8            | One bud and two leaves            | Lishui City,       |
| Y9      | 2013            | 9            |                                   | Zhejiang Province, |
| Y10     | 2012            | 10           |                                   | China              |
| Y11     | 2011            | 11           |                                   |                    |
| Y12     | 2010            | 12           |                                   |                    |
| Y13     | 2009            | 13           |                                   |                    |
| Y14     | 2008            | 14           |                                   |                    |
| Y15     | 2007            | 15           |                                   |                    |
| Y16     | 2006            | 16           |                                   |                    |

**Table S2.** Content of functional compounds in organic green tea samples with different storage years.

| Compounds<br>(mg/g) | Storage years |            |            |            |            |            |            |            |            |             |            |            |            |            |            |            |
|---------------------|---------------|------------|------------|------------|------------|------------|------------|------------|------------|-------------|------------|------------|------------|------------|------------|------------|
|                     | 1             | 2          | 3          | 4          | 5          | 6          | 7          | 8          | 9          | 10          | 11         | 12         | 13         | 14         | 15         | 16         |
| Tea polyphenols(%)  | 14.68±0.4     | 14.73±0.14 | 14.23±0.06 | 13.91±0.13 | 14.12±0.35 | 13.58±0.12 | 13.48±0.06 | 13.17±0.10 | 13.30±0.10 | 13.04±0.26  | 12.96±0.11 | 12.69±0.11 | 12.47±0.05 | 12.23±0.06 | 12.28±0.05 | 10.55±0.05 |
| Total flavonoids    | 18.61±0.09    | 25.71±0.09 | 23.65±0.06 | 19.12±0.06 | 18.04±0.13 | 13.57±0.06 | 21.56±0.09 | 18.47±0.11 | 18.53±0.09 | 16.47±0.06  | 19.16±0.06 | 23.55±0.09 | 17.52±0.09 | 14.54±0.06 | 21.69±0.13 | 21.37±0.13 |
| Soluble sugars      | 38.08±0.43    | 34.45±0.43 | 37.24±1.54 | 42.92±0.70 | 46.18±0.43 | 46.46±0.70 | 45.72±0.16 | 47.11±0.16 | 43.95±1.06 | 43.58±0.28  | 37.90±1.59 | 32.77±0.43 | 25.51±0.70 | 28.21±0.28 | 24.39±0.85 | 29.89±0.28 |
| Total amino acids   | 41.06±3.50    | 41.41±3.54 | 43.13±1.08 | 52.13±0.22 | 54.12±0.32 | 53.52±1.46 | 45.96±0.67 | 42.23±2.87 | 42.90±4.75 | 42.08±1.56  | 42.23±2.87 | 41.00±1.88 | 40.90±3.74 | 36.16±1.78 | 32.22±0.06 | 30.07±5.86 |
| Caffeine            | 29.49±0.91    | 30.54±0.68 | 33.79±1.92 | 31.16±0.73 | 31.06±0.80 | 29.69±1.27 | 36.42±0.52 | 33.13±0.65 | 34.98±1.01 | 33.96±1.76  | 34.38±0.56 | 31.24±2.11 | 31.16±0.65 | 31.43±0.31 | 32.70±2.21 | 35.72±1.07 |
| GA                  | 0.01±0.00     | 0.02±0.00  | 0.02±0.00  | 0.02±0.00  | 0.06±0.01  | 0.02 ±0.00 | 0.03±0.00  | 0.04±0.00  | 0.04±0.00  | 0.06±0.00   | 0.04±0.00  | 0.07±0.01  | 0.09±0.00  | 0.09±0.00  | 0.17±0.00  | 0.26±0.01  |
| GC                  | 0.04±0.00     | 0.02±0.00  | 0.02±0.00  | 0.02±0.00  | 0.02±0.00  | 0.03±0.00  | 0.04±0.00  | 0.03±0.00  | 0.02±0.00  | 0.02±0.00   | 0.02±0.00  | 0.04±0.01  | 0.01±0.00  | 0.01±0.00  | 0.02±0.00  | 0.02±0.00  |
| EGC                 | 1.20±0.08     | 0.92±0.05  | 0.96±0.08  | 0.88±0.05  | 0.78±0.09  | 0.96±0.06  | 1.01±0.04  | 0.79±0.02  | 0.73±0.01  | 0.76±0.13   | 0.71±0.05  | 0.89±0.18  | 0.49±0.01  | 0.42±0.02  | 0.48±0.03  | 0.45±0.01  |
| C                   | 0.05±0.00     | 0.02±0.00  | 0.02±0.00  | 0.03±0.00  | 0.02±0.00  | 0.03±0.00  | 0.08±0.00  | 0.05±0.01  | 0.03±0.01  | 0.02±0.01   | 0.03±0.01  | 0.03±0.01  | 0.01±0.00  | 0.01±0.00  | 0.03±0.00  | 0.03±0.00  |
| EGCG                | 66.27±9.42    | 33.79±4.76 | 22.22±3.80 | 47.19±1.53 | 12.36±2.35 | 67.01±7.57 | 41.11±4.16 | 23.57±4.07 | 70.68±3.33 | 76.25±18.24 | 54.90±5.53 | 59.83±7.33 | 31.20±5.43 | 22.82±1.64 | 52.35±2.34 | 42.25±3.38 |
| EC                  | 0.52±0.02     | 0.31±0.02  | 0.32 ±0.02 | 0.29±0.02  | 0.27±0.03  | 0.35±0.14  | 1.03±0.04  | 0.48±0.12  | 0.36±0.01  | 0.23±0.04   | 0.27±0.02  | 0.28±0.04  | 0.15±0.01  | 0.16±0.01  | 0.18±0.01  | 0.14±0.00  |
| GCG                 | 0.78±0.15     | 0.37±0.05  | 0.35±0.04  | 0.42±0.02  | 0.26±0.03  | 0.56±0.09  | 0.45±0.03  | 0.34±0.05  | 0.42±0.01  | 0.55±0.15   | 0.47±0.01  | 0.63±0.20  | 0.11±0.01  | 0.21±0.01  | 0.19±0.04  | 0.19±0.01  |
| ECG                 | 4.83±0.73     | 2.09±0.34  | 1.08±0.22  | 2.39±0.08  | 1.25±0.28  | 1.99±0.27  | 4.52±0.67  | 1.05±0.35  | 4.28±0.19  | 4.52±1.14   | 5.19±0.33  | 5.76±1.43  | 3.31±0.42  | 1.44±0.16  | 3.95±0.48  | 3.45±0.33  |
| CG                  | 0.01±0.00     | 0.01±0.00  | 0.01±0.00  | 0.01±0.00  | 0.01±0.00  | 0.01±0.00  | ND         | 0.01±0.00  | 0.02±0.01  | 0.01±0.00   | 0.01±0.00  | 0.01±0.00  | 0.01±0.00  | 0.02 ±0.00 | 0.02 ±0.00 | 0.02±0.00  |
| Taxifolin           | 2.81±0.03     | 2.57±0.14  | 2.62±0.43  | 2.88±0.49  | 2.72±0.68  | 2.71±0.89  | 2.91±0.74  | 2.97±0.60  | 2.22±0.12  | 2.17±0.30   | 2.24±0.03  | 2.12±0.08  | 2.26±0.09  | 2.37±0.29  | 2.42±0.13  | 2.29±0.22  |
| Luteoloside         | 0.2±0.06      | 0.20±0.06  | 0.16±0.01  | 0.13±0.01  | 0.12±0.03  | 0.14±0.04  | 0.12±0.02  | 0.11±0.01  | 0.11±0.01  | 0.10±0.00   | 0.09±0.00  | 0.11±0.01  | 0.10±0.01  | 0.09±0.01  | 0.09±0.01  | 0.10±0.00  |
| Rutin               | 0.50±0.04     | 0.62±0.07  | 0.53±0.07  | 0.53±0.03  | 0.59±0.16  | 0.56±0.02  | 0.73±0.08  | 0.64±0.04  | 0.62±0.02  | 0.50±0.02   | 0.67±0.00  | 0.60±0.05  | 0.50±0.01  | 0.56±0.05  | 0.51±0.06  | 0.52±0.07  |
| Ellagic acid        | 4.63±0.04     | 3.18±0.04  | 2.87±0.04  | 4.22±0.35  | 4.31±0.30  | 4.79±0.38  | 3.56±0.23  | 3.26±0.12  | 3.41±0.06  | 2.94±0.24   | 3.38±0.09  | 4.08±0.04  | 3.02±0.23  | 3.84±0.34  | 2.74±0.07  | 2.16±0.06  |
| Myricetin           | 0.85±0.06     | 0.69±0.01  | 0.60±0.01  | 0.98±0.07  | 0.86±0.04  | 0.87±0.03  | 0.53±0.06  | 0.64±0.02  | 0.68±0.01  | 0.53±0.06   | 0.60±0.04  | 0.69±0.01  | 0.59±0.02  | 0.77±0.04  | 0.36±0.00  | 0.21±0.01  |
| Quercetin           | 5.50±0.31     | 4.68±0.06  | 3.50±0.03  | 5.34±0.24  | 4.68±0.15  | 4.28±0.11  | 4.02±0.48  | 4.73±0.14  | 4.37±0.29  | 3.50±0.17   | 4.76±0.11  | 4.48±0.22  | 4.09±0.20  | 4.43±0.16  | 2.67±0.11  | 2.17±0.14  |
| Luteolin            | 0.12±0.03     | 0.12±0.00  | 0.09±0.01  | 0.10±0.01  | 0.10±0.00  | 0.10±0.01  | 0.11±0.01  | 0.12±0.01  | 0.10±0.02  | 0.10±0.00   | 0.11±0.01  | 0.11±0.01  | 0.11±0.00  | 0.10±0.00  | 0.11±0.00  | 0.11±0.01  |

|                 |            |            |            |             |            |            |            |             |            |            |            |            |            |            |            |            |
|-----------------|------------|------------|------------|-------------|------------|------------|------------|-------------|------------|------------|------------|------------|------------|------------|------------|------------|
| Kaempferol      | 4.84±0.28  | 3.30±0.18  | 2.89±0.02  | 4.93±0.31   | 3.50±0.14  | 3.68±0.15  | 3.21±0.02  | 3.13±0.08   | 3.95±0.14  | 2.43±0.18  | 3.82±0.22  | 3.72±0.04  | 3.65±0.20  | 4.58±0.11  | 2.23±0.01  | 1.47±0.05  |
| L-aspartic acid | 2.15±0.19  | 2.39±0.38  | 2.48±1.22  | 3.03±0.97   | 3.53±1.20  | 4.46±1.91  | 3.51±1.90  | 2.95±0.92   | 3.73±1.70  | 3.71±2.12  | 4.91±2.14  | 3.25±1.65  | 3.13±2.57  | 2.86±0.53  | 2.98±0.91  | 2.19±0.10  |
| L-glutamic acid | 2.46±0.35  | 3.61±0.60  | 5.08±1.59  | 4.44±2.12   | 3.90±1.27  | 3.40±1.01  | 2.97±1.20  | 3.86±1.13   | 4.34±0.82  | 4.57±0.65  | 3.50±1.11  | 2.77 ±0.64 | 2.26±0.07  | 2.37±0.43  | 2.31±0.26  | 2.40±0.31  |
| L-serine        | 0.71±0.04  | 0.36±0.03  | 0.37±0.01  | 0.83 ±0.22  | 0.51±0.35  | 0.68±0.03  | 0.99±0.12  | 1.07±0.25   | 0.85±0.12  | 0.79±0.10  | 1.04±0.06  | 0.84±0.18  | 1.15±0.16  | 1.00±0.09  | 0.75±0.07  | 0.44 ±0.21 |
| glycine         | 0.60±0.06  | 0.56±0.06  | 0.45±0.02  | 0.47±0.09   | 0.44 ±0.02 | 0.79±0.01  | 0.57 ±0.05 | 0.45±0.01   | 0.46±0.14  | 0.46±0.03  | 0.77 ±0.09 | 0.45 ±0.08 | 0.39±0.01  | 0.38 ±0.01 | 0.42 ±0.03 | 0.40 ±0.02 |
| L-histidine     | 1.23±0.37  | 0.51±0.07  | 0.99±0.49  | 0.65±0.08   | 1.06 ±0.48 | 0.95±0.11  | 0.74±0.01  | 1.19±0.85   | 1.01±0.42  | 1.00±0.68  | 1.19±0.24  | 0.74±0.31  | 0.45 ±0.03 | 0.53±0.15  | 0.54 ±0.04 | 0.57 ±0.09 |
| L-arginine      | 0.95±0.31  | 0.60 ±0.19 | 1.14±0.80  | 1.97 ±1.47  | 1.65±0.33  | 1.06 ±0.39 | 1.74 ±0.37 | 1.19 ±0.40  | 0.79±0.10  | 1.01 ±0.49 | 1.36 ±0.95 | 0.33±0.25  | 1.66±0.32  | 1.26 ±0.71 | 1.21 ±0.57 | 1.29±1.72  |
| L-threonine     | 0.26±0.08  | 0.51 ±0.27 | 0.17 ±0.06 | 0.16 ±0.08  | 0.21 ±0.16 | 0.96±0.24  | 0.54±0.15  | 0.43 ±0.14  | 0.36±0.21  | 0.51±0.39  | 0.81±0.21  | 0.09 ±0.08 | ND         | 0.04±0.04  | 0.06±0.09  | 0.03±0.09  |
| L-alanine       | 0.61±0.02  | 0.62±0.07  | 0.50 ±0.01 | 0.49±0.08   | 0.62±0.01  | 0.57±0.02  | 0.60±0.10  | 0.61±0.05   | 0.53±0.04  | 0.57 ±0.06 | 0.59±0.06  | 0.65 ±0.06 | 0.59 ±0.12 | 0.59±0.02  | 0.71±0.08  | 0.61 ±0.03 |
| L-proline       | 2.61±0.25  | 1.70±0.05  | 2.22 ±0.09 | 2.07±0.20   | 2.12 ±0.02 | 2.23 ±0.14 | 2.15±0.16  | 3.16 ±0.03  | 2.49±0.12  | 1.95±0.22  | 2.46±0.30  | 1.81±0.13  | 1.76±0.15  | 1.54±0.17  | 1.50±0.07  | 1.52±0.14  |
| L-Theanine      | 20.28±2.02 | 21.24±0.77 | 23.16±1.29 | 31.24 ±2.29 | 32.72±.079 | 28.29±2.51 | 22.76±2.40 | 21.26 ±0.67 | 19.92±1.73 | 18.98±0.71 | 18.67±0.71 | 17.93±0.48 | 17.08±1.07 | 12.56±2.22 | 12.26±2.25 | 10.40±0.61 |
| L-cystine       | 1.28±0.11  | 0.62 ±0.05 | 0.44 ±0.13 | 0.25±0.01   | 0.28 ±0.01 | 0.75±0.29  | 0.82±0.03  | 0.90 ±0.03  | 1.00±0.61  | 1.35±0.08  | 1.25 ±0.46 | 1.12±0.02  | 0.66±0.01  | 1.66±0.90  | 0.92±0.80  | 0.76±0.22  |
| L-tyrosine      | 1.04±.34   | 0.45±0.04  | 0.69±0.32  | 0.77 ±0.04  | 1.35 ±0.09 | 1.13±0.04  | 1.35±0.09  | 1.26±0.04   | 0.83 ±0.27 | 1.12 ±0.02 | 1.17±0.04  | 0.96 ±0.07 | 1.26±0.04  | 1.45±0.07  | 0.87±0.08  | 0.78±0.03  |
| L-valine        | 0.41±0.02  | 0.35 ±0.00 | 0.39±0.08  | 0.50±0.03   | 0.45 ±0.02 | 0.49±0.11  | 0.43±0.01  | 0.44±0.00   | 0.47±0.12  | 0.50±0.01  | 0.55±0.03  | 0.34±0.03  | 0.32±0.03  | 0.35 ±0.01 | 0.46±0.01  | 0.47±0.02  |
| L-methionine    | 0.57±0.04  | 0.66 ±0.02 | 0.60±0.01  | 0.46±0.01   | 0.59 ±0.04 | 0.49 ±0.01 | 0.54±0.03  | 0.56±0.04   | 0.57±0.04  | 0.66 ±0.02 | 0.60±0.01  | 0.46±0.01  | 0.59 ±0.04 | 0.49 ±0.01 | 0.54±0.03  | 0.56±0.04  |
| L-isoleucine    | 0.85±0.06  | 0.58±0.03  | 0.87 ±0.48 | 0.47 ±0.02  | 0.82±0.05  | 0.49±0.15  | 0.81±0.04  | 0.77±0.03   | 0.85±0.06  | 0.58±0.03  | 0.87 ±0.48 | 0.47 ±0.02 | 0.82±0.05  | 0.49±0.15  | 0.81±0.04  | 0.77±0.03  |
| L-leucine       | 0.64 ±0.21 | 0.98±0.03  | 0.99±0.04  | 0.51±0.01   | 0.80 ±0.04 | 0.65 ±0.06 | 0.79±0.03  | 0.77±0.03   | 0.64 ±0.21 | 0.98±0.03  | 0.99±0.04  | 0.51±0.01  | 0.80 ±0.04 | 0.65 ±0.06 | 0.79±0.03  | 0.77±0.03  |
| L-phenylalanine | 0.85 ±0.01 | 0.68 ±0.02 | 1.35 ±0.42 | 0.90±0.03   | 1.54±0.07  | 1.28±0.42  | 1.75 ±0.10 | 1.31 ±0.05  | 0.85 ±0.01 | 0.68 ±0.02 | 1.35 ±0.42 | 0.90±0.03  | 1.54±0.07  | 1.28±0.42  | 1.75 ±0.10 | 1.31 ±0.05 |
| L-lysine        | 0.67±0.01  | 0.61±0.01  | 0.83 ±0.07 | 0.57±0.01   | 0.75 ±0.02 | 0.68 ±0.05 | 0.77±0.02  | 0.71 ±0.02  | 0.67±0.01  | 0.61±0.01  | 0.83 ±0.07 | 0.57±0.01  | 0.75 ±0.02 | 0.68 ±0.05 | 0.77±0.02  | 0.71 ±0.02 |
| TFs             | 0.08±0.01  | 0.10±0.01  | 0.10±0.00  | 0.11±0.01   | 0.09±0.01  | 0.07±0.01  | 0.09±0.00  | 0.08±0.01   | 0.09±0.00  | 0.11±0.01  | 0.11±0.01  | 0.08±0.01  | 0.08±0.00  | 0.08±0.01  | 0.07±0.01  | 0.08±0.00  |
| TBs             | 4.68±0.02  | 5.90±0.02  | 5.31±0.03  | 5.25±0.06   | 5.14±0.11  | 3.64±0.02  | 3.07±0.09  | 4.50±0.10   | 4.78±0.06  | 4.85±0.04  | 4.54±0.04  | 4.93±0.09  | 5.69±0.10  | 4.78±0.09  | 3.61±0.10  | 3.58±0.12  |
| TRs             | 1.81±0.2   | 2.19±0.05  | 2.28±0.02  | 2.31±0.02   | 2.70±0.01  | 2.73±0.09  | 2.78±0.04  | 2.89±0.02   | 2.920±0.04 | 2.97±0.06  | 2.96±0.05  | 3.01±0.02  | 3.00±0.02  | 3.08±0.07  | 3.45±0.05  | 3.48±0.04  |
| Chlorophyll-a   | 2.36±0.01  | 3.21±0.03  | 2.35±0.02  | 2.47±0.02   | 2.37±0.01  | 1.83±0.01  | 2.07±0.01  | 2.85±0.00   | 2.56±0.00  | 2.00±0.00  | 1.88±0.13  | 2.31±0.01  | 3.08±0.01  | 2.13±0.01  | 1.50±0.05  | 1.56±0.00  |
| Chlorophyll-b   | 0.94±0.04  | 0.56±0.01  | 0.54±0.05  | 0.37±0.02   | 0.23±0.03  | 0.26±0.04  | 0.23±0.03  | 0.37±0.02   | 0.35±0.01  | 0.35±0.03  | 0.20±0.02  | 0.24±0.04  | 0.35±0.03  | 0.20±0.03  | 0.22±0.14  | 0.25±0.02  |
| Carotenoids     | 0.68±0.01  | 0.79±0.01  | 0.71±0.02  | 0.56±0.01   | 0.44±0.01  | 0.34±0.01  | 0.37±0.00  | 0.54±0.01   | 0.56±0.00  | 0.27±0.01  | 0.28±0.02  | 0.37±0.01  | 0.43±0.01  | 0.33±0.01  | 0.17±0.03  | 0.23±0.00  |



|             |           |           |           |           |           |           |           |           |           |           |           |           |           |           |           |           |
|-------------|-----------|-----------|-----------|-----------|-----------|-----------|-----------|-----------|-----------|-----------|-----------|-----------|-----------|-----------|-----------|-----------|
| Anthocyanin | 3.73±0.00 | 3.90±0.29 | 3.90±0.29 | 4.07±0.29 | 3.73±0.29 | 3.56±0.29 | 3.39±0.29 | 3.29±0.29 | 3.05±0.29 | 3.39±0.29 | 3.22±0.00 | 2.89±0.29 | 3.22±0.29 | 2.21±0.29 | 2.38±0.29 | 2.55±0.29 |
|-------------|-----------|-----------|-----------|-----------|-----------|-----------|-----------|-----------|-----------|-----------|-----------|-----------|-----------|-----------|-----------|-----------|

**Table S3.** The correlation coefficient between 20 functional compounds in organic green tea and storage years.

| Pearson'r         | Storage years |
|-------------------|---------------|
| Storage years     | 1             |
| Tea polyphenols   | -.0945**      |
| Soluble sugars    | -.0588*       |
| Total amino acids | -.0648**      |
| Ellagic acid      | -.0510*       |
| Gallic acid       | 0.779**       |
| EGC               | -0.863**      |
| GCG               | -0.500*       |
| CG                | 0.596*        |
| Luteoloside       | -0.854**      |
| Myricetin         | -0.639**      |
| Quercetin         | -0.618*       |
| L-glutamic acid   | -0.527*       |
| L-proline         | -0.505*       |
| Theanine          | 0-.748**      |
| L-methionine      | -0.613*       |
| L-leucine         | -0.567*       |
| TBs               | 0.949**       |
| Chlorophyll-b     | -0.685**      |
| Carotenoids       | -0.815**      |
| Anthocyanin       | -0.904**      |

\*\* . p<0.01, \* . p<0.05, Significant correlation.

**Table S4.** The correlation coefficient between 18 functional compounds in organic green tea and electronic tongue signals.

| Pearson'r         | SRS      | GPS      | STS      | UMS      | SPS      | SWS      | BRS      |
|-------------------|----------|----------|----------|----------|----------|----------|----------|
| Tea polyphenols   | 0.868**  | 0.845**  | 0.866**  | 0.916**  | 0.949**  | 0.709**  | 0.896**  |
| Soluble sugars    | 0.391    | 0.310    | 0.275    | 0.650**  | 0.635**  | 0.056    | 0.481    |
| Total amino acids | 0.458    | 0.424    | 0.403    | 0.661**  | 0.696**  | 0.144    | 0.577*   |
| Gallic acid       | -.608*   | -.581*   | -.632**  | -.883**  | -.820**  | -0.457   | -0.647** |
| EGC               | 0.787**  | 0.757**  | 0.763**  | 0.744**  | 0.848**  | 0.614*   | 0.766**  |
| CG                | -0.425   | -0.374   | -0.368   | -0.518*  | -0.617*  | -0.127   | -0.497   |
| Luteoloside       | 0.953**  | 0.968**  | 0.943**  | 0.691**  | 0.813**  | 0.934**  | 0.875**  |
| Myricetin         | 0.529*   | 0.541*   | 0.560*   | 0.725**  | 0.666**  | 0.386    | 0.566*   |
| Quercetin         | 0.501*   | 0.506*   | 0.556*   | 0.739**  | 0.657**  | 0.474    | 0.497    |
| L-glutamic acid   | 0.355    | 0.279    | 0.359    | 0.643**  | 0.542*   | -0.005   | 0.477    |
| L-proline         | 0.324    | 0.243    | 0.293    | 0.632**  | 0.561*   | 0.099    | 0.276    |
| Theanine          | 0.588*   | 0.552*   | 0.537*   | 0.709**  | 0.775**  | 0.248    | 0.704**  |
| L-methionine      | 0.640**  | 0.598*   | 0.585*   | 0.596*   | 0.621*   | 0.578*   | 0.619*   |
| L-leucine         | 0.517*   | 0.468    | 0.477    | 0.596*   | 0.605*   | 0.354    | 0.530*   |
| TBs               | -0.937** | -0.930** | -0.975** | -0.883** | -0.929** | -0.790** | -0.905** |
| Chlorophyll-b     | 0.771**  | 0.767**  | 0.831**  | 0.616*   | 0.643**  | 0.772**  | 0.641**  |
| Carotenoids       | 0.810**  | 0.800**  | 0.855**  | 0.837**  | 0.818**  | 0.728**  | 0.774**  |
| Anthocyanin       | 0.807**  | 0.772**  | 0.807**  | 0.830**  | 0.911**  | 0.550*   | 0.856**  |

\*\*. $p < 0.01$ , \*. $p < 0.05$ , Significant correlation.

**Table S5.** The correlation coefficient between the color difference values of dry tea and tea liquor and tea pigments.

| Pearson'r     | L*(Dry tea) | a*(Dry tea) | b*(Dry tea) | LL*(Tea liquor) | La*(Tea liquor) | Lb*(Tea liquor) |
|---------------|-------------|-------------|-------------|-----------------|-----------------|-----------------|
| TFs           | -0.221      | -0.289      | 0.506*      | 0.500*          | -0.559*         | 0.394           |
| TRs           | 0.047       | -0.165      | 0.164       | 0.208           | -0.453          | 0.300           |
| TBs           | -0.536*     | 0.677**     | -0.623**    | -0.407          | 0.645**         | -0.084          |
| Chlorophyll-a | 0.242       | -0.251      | 0.222       | 0.256           | -0.414          | 0.235           |
| Chlorophyll-b | 0.340       | -0.549*     | 0.534*      | 0.488           | -0.537*         | 0.360           |
| Carotenoids   | 0.417       | -0.535*     | 0.439       | 0.410           | -0.598*         | 0.249           |
| Anthocyanin   | 0.558*      | -0.741**    | 0.603*      | 0.449           | -0.812**        | 0.075           |

\*\* $p < 0.01$ , \* $p < 0.05$ , Significant correlation.

**Table S6.** BPNN classification results and model performance metrics based on E-tongue, chromatism, and 10 compounds (VIP $\geq$ 1).

| Date sources                   | Neural model | Training set accuracy | Test set accuracy | Recall | Precision | F1-score |
|--------------------------------|--------------|-----------------------|-------------------|--------|-----------|----------|
| E-tongue                       | 7-8-3        | 100%                  | 97.92%            | 0.9793 | 0.9723    | 0.9758   |
| 10 compounds<br>(VIP $\geq$ 1) | 10-9-3       | 100%                  | 91.67%            | 0.9443 | 0.9167    | 0.9303   |
| Chromatism                     | 6-5-3        | 99.07%                | 94.44%            | 0.9583 | 0.9523    | 0.9553   |

**Table S7.** The correlation coefficient between the antioxidative activity and functional components of organic green tea.

| Pearson'r        | DPPH    | SSA    | HSA      | ABTS     | FRAP    |
|------------------|---------|--------|----------|----------|---------|
| Caffeine         | 0.398   | -0.232 | -0.262   | 0.238    | -0.057  |
| Gallic acid      | -0.170  | -0.359 | -0.676** | 0.497    | -0.310  |
| GC               | -0.175  | 0.444  | .568*    | -0.060   | 0.094   |
| EGC              | -0.244  | 0.491  | 0.869**  | -0.562*  | 0.429   |
| C                | 0.017   | 0.535* | 0.344    | 0.089    | 0.043   |
| EGCG             | 0.097   | 0.051  | 0.148    | 0.028    | -0.097  |
| EC               | 0.109   | 0.522* | 0.498*   | -0.068   | 0.154   |
| GCG              | -0.055  | 0.324  | 0.590*   | -0.290   | 0.139   |
| ECG              | 0.097   | 0.221  | 0.125    | 0.256    | -0.172  |
| CG               | -0.011  | -0.428 | -0.448   | 0.215    | -0.245  |
| Taxifolin        | -0.250  | 0.435  | 0.216    | -0.474   | 0.350   |
| Luteoloside      | -0.574* | 0.512* | 0.795**  | -0.717** | 0.574*  |
| Rutin            | 0.266   | -0.011 | 0.190    | 0.331    | -0.254  |
| Ellagic acid     | -0.186  | 0.329  | 0.464    | -0.136   | 0.054   |
| Myricetin        | -0.084  | 0.246  | 0.463    | -0.379   | 0.207   |
| Quercetin        | 0.100   | 0.328  | 0.465    | -0.255   | 0.026   |
| Luteolin         | -0.043  | 0.508* | 0.101    | 0.116    | -0.203  |
| Kaempferol       | 0.169   | 0.354  | 0.318    | -0.176   | -0.046  |
| L-aspartic acid  | 0.351   | -0.155 | -0.086   | 0.378    | -0.293  |
| L-glutamic acid  | 0.095   | -0.179 | 0.406    | -0.643** | 0.588*  |
| L-serine         | 0.795** | 0.105  | -0.390   | 0.533*   | -0.585* |
| glycine          | -0.206  | 0.429  | 0.424    | 0.042    | 0.018   |
| L-histidine      | 0.063   | 0.113  | 0.489    | -0.312   | 0.333   |
| L-arginine       | 0.071   | 0.325  | -0.277   | 0.120    | 0.044   |
| L-threonine      | -0.040  | 0.220  | 0.349    | -0.005   | 0.126   |
| L-alanine        | -0.223  | -0.058 | -0.233   | 0.549*   | -0.419  |
| L-proline        | 0.222   | 0.257  | 0.545*   | -0.296   | 0.268   |
| Theanine         | -0.237  | 0.186  | 0.567*   | -0.462   | 0.425   |
| L-cystine        | 0.395   | -0.017 | -0.305   | 0.339    | -0.334  |
| L-tyrosine       | 0.412   | 0.039  | -0.354   | 0.450    | -0.331  |
| L-valine         | -0.096  | 0.102  | 0.001    | 0.061    | 0.208   |
| L-methionine     | -0.260  | 0.080  | 0.580*   | -0.546*  | 0.524*  |
| L-isoleucine     | 0.153   | 0.237  | 0.400    | -0.346   | 0.346   |
| L-leucine        | 0.006   | -0.050 | 0.484    | -0.452   | 0.373   |
| L-phenylalanine  | 0.310   | 0.044  | 0.139    | 0.077    | 0.074   |
| L-lysine         | 0.202   | 0.057  | 0.409    | -0.284   | 0.250   |
| Tea polyphenols  | -0.241  | 0.447  | 0.850**  | -0.713** | 0.577*  |
| Total flavonoids | -0.188  | -0.046 | 0.267    | -0.122   | -0.007  |
| Soluble sugars   | -0.002  | 0.105  | 0.515*   | -0.360   | 0.443   |

|                   |        |        |          |          |        |
|-------------------|--------|--------|----------|----------|--------|
| Total amino acids | -0.077 | 0.143  | 0.481    | -0.324   | 0.280  |
| TFs               | 0.124  | 0.021  | 0.202    | -0.465   | 0.305  |
| TRs               | 0.181  | -0.307 | 0.115    | -0.423   | 0.086  |
| TBs               | 0.299  | -.541* | -0.792** | 0.767**  | -.558* |
| Chlorophyll-a     | 0.199  | -0.036 | 0.297    | -0.398   | 0.089  |
| Chlorophyll-b     | -0.306 | 0.528* | 0.660**  | -0.749** | 0.554* |
| Carotenoids       | -0.169 | 0.252  | 0.730**  | -0.770** | 0.525* |
| Anthocyanin       | -0.244 | 0.350  | 0.692**  | -0.708** | 0.550* |

\*\* $p < 0.01$ , \* $p < 0.05$ , Significant correlation.
